# Supplementary material for: Oxidative Stress-Induced Afterdepolarizations and Protein Kinase C Signaling
Source: MDPI journal article supplement (doi:10.3390/ijms18040688), 2017-03-30
Supplement: s1 [file s1]

# Supplementary Materials: Oxidative Stress-Induced Afterdepolarizations and Protein Kinase C Signaling

Yu-Dong Fei, Wei Li, Jian-Wen Hou, Kai Guo, Xiao-Meng Chen, Yi-He Chen, Qian Wang, Xiao-Lei Xu, Yue-Peng Wang and Yi-Gang Li

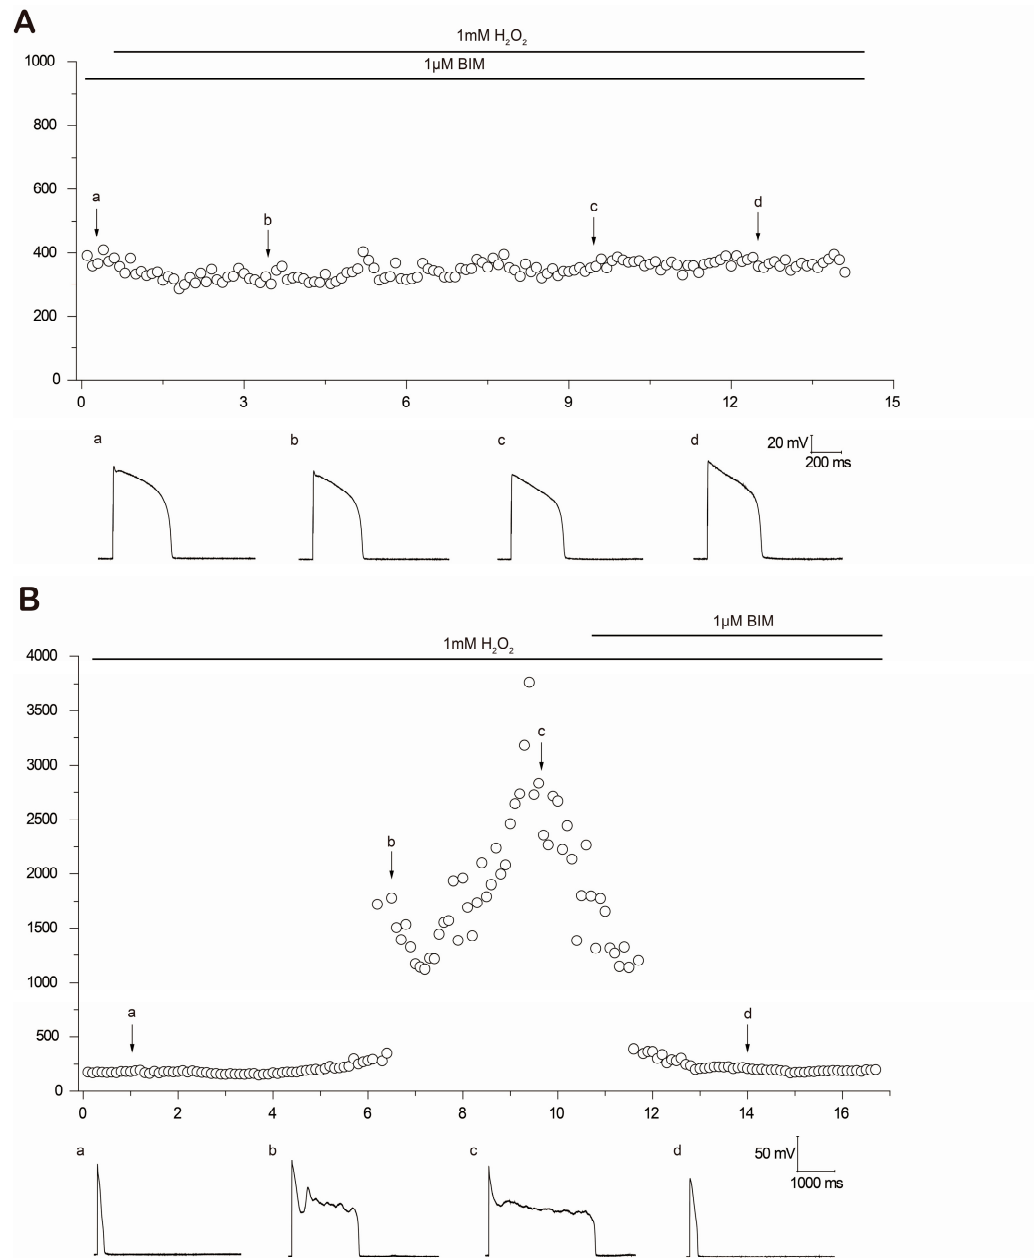

**Figure S1.** Effects of BIM on H<sub>2</sub>O<sub>2</sub>-induced early afterdepolarizations (EADs). (A). Time course of action potential durations (APD) 90 in a myocyte pretreated with BIM before exposure to 1 mM H<sub>2</sub>O<sub>2</sub>. Action potentials (APs) in the presence of BIM (a), after perfusion of H<sub>2</sub>O<sub>2</sub> for 3 min (b), 9 min (c) and 12 min (d), are shown below. (B) Time course of APD 90 in a myocyte treated with BIM after EADs were induced by H<sub>2</sub>O<sub>2</sub>, as indicated by the horizontal bar. APs after perfusion with H<sub>2</sub>O<sub>2</sub> for 1 min (a), 6 min (b) and 9 min (c) and after application of BIM (d) are shown below.
